# Supplementary material for: Vibrating membrane with discontinuities for rapid and efficient microfluidic mixing
Source: Royal Society of Chemistry journal article supplement (doi:10.1039/c5lc00836k), 2015-01-01
Supplement: c5lc00836k3.pdf [file c5lc00836k3.pdf]

# Vibrating membrane with discontinuities for rapid and efficient microfluidic mixing

Hoang Van Phan,<sup>a</sup> M. Bulut Coşkun,<sup>a</sup> Muhsincan Şeşen,<sup>a</sup> Gregory Pandraud,<sup>b</sup> Adrian Neild<sup>a</sup> and Tuncay Alan<sup>a</sup>

<sup>a</sup>Laboratory for Micro Systems, Department of Mechanical and Aerospace Engineering, Monash University, Clayton, VIC 3800, Australia.

<sup>b</sup>Else Kooi Laboratory, Delft University of Technology 2628 CT Delft, The Netherlands

## Supporting information

### Videos

*Acoustic Membrane Video 1: Particles visualisation of streaming by the membrane.*

In this video, we make use of particles to visualise the streaming vortices generated by the membrane. Two fluid streams of 2%wt PEG in water solution are pumped into the channel at 5  $\mu\text{l}/\text{min}$  each. The bottom stream contains 2.01  $\mu\text{m}$  fluorescent particles mixed at 5% v/v in the PEG-water solution.

The channel is 1000- $\mu$ -wide and 80- $\mu\text{m}$ -high, the membrane's side length is 455  $\mu\text{m}$  and the hole's diameter is 200  $\mu\text{m}$ . The flow is from right to left.

The streaming vortices shown in Fig. 5(a) and (c) are extracted from this video, but are mirrored about the horizontal line.

*Acoustic Membrane Video 2: Mixing at 60  $\mu\text{l}/\text{min}$  total flow rate.*

This video shows mixing at 60  $\mu\text{l}/\text{min}$  total flow rate (Peclet number is approximately 8000) using a membrane with a circular hole. The mixing time is 3 ms, and the mixing efficiency is 90%.

The channel is 1000- $\mu$ -wide and 80- $\mu\text{m}$ -high, the membrane's side length is 455  $\mu\text{m}$  and the hole's diameter is 200  $\mu\text{m}$ . The flow is from right to left.

All videos are recorded and played at 15 frames per second.

### Materials properties

#### COMSOL: Thermal distribution

---

<sup>1</sup>P. B. Muller, R. Barnkob, M. J. H. Jensen and H. Bruus, Lab Chip, 2012, **12**, 4617–4627.

<sup>2</sup>S. Hawley, J. Allegra and G. Holton, J. Acoust. Soc. Am., 1970, **47**, 137–143.

Table 1: List of materials properties used in COMSOL simulations

| LPCVD Silicon nitride (SiN)   |              |                           |                                  |
|-------------------------------|--------------|---------------------------|----------------------------------|
| Density                       | $\rho_{SiN}$ | 3000                      | $\text{kg m}^{-3}$               |
| Young's modulus               | $E$          | 290                       | GPa                              |
| Poisson's ratio               | $\nu_{SiN}$  | 0.27                      |                                  |
| Water <sup>1</sup>            |              |                           |                                  |
| Density                       | $\rho$       | 998                       | $\text{kg m}^{-3}$               |
| Dynamic viscosity             | $\mu$        | 0.893                     | mPa s                            |
| Bulk viscosity <sup>2</sup>   | $\mu_B$      | 2.18                      | mPa s                            |
| Speed of sound                | $c$          | 1495                      | $\text{m s}^{-1}$                |
| Thermal conductivity          | $k_{th}$     | 0.603                     | $\text{W m}^{-1} \text{K}^{-1}$  |
| Specific heat capacity        | $C_p$        | 4183                      | $\text{J kg}^{-1} \text{K}^{-1}$ |
| Specific heat ratio           | $\gamma$     | 1.014                     |                                  |
| Thermal diffusivity           | $D_{th}$     | $1.43 \times 10^{-7}$     | $\text{m}^2 \text{s}^{-1}$       |
| Thermal expansion coefficient | $\alpha$     | $2.97 \times 10^{-4}$     | $\text{K}^{-1}$                  |
| Isentropic compressibility    | $\beta_0$    | $448.319 \times 10^{-12}$ | $\text{Pa}^{-1}$                 |

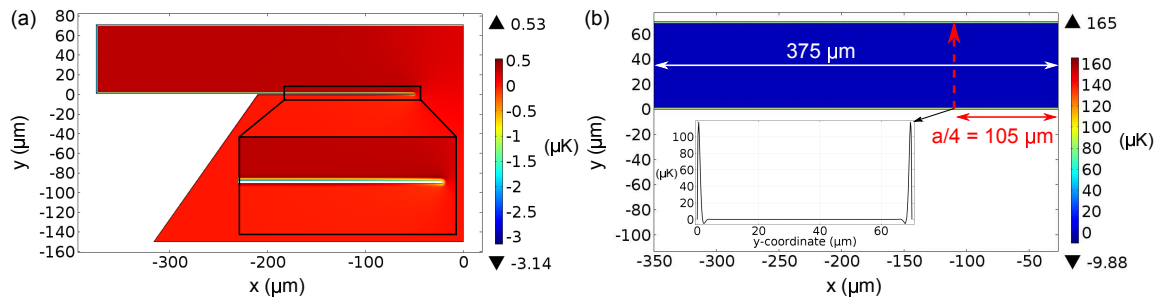

Figure 1: First-order temperature field  $T_1$  of the membrane with (a) and without (b) the hole.
